# Supplementary material for: Semaphorin3A Promotes the Development of Nickel Allergy
Source: Research Square preprint supplement (doi:10.21203/rs.3.rs-598449/v1), 2021-06-21
Supplement: Supplementary file 1 [file 25cbc2779ca6f872970c869d.xlsx]

## Sheet: Fig 1a
	Fig 1a
	PCR	20180628
	qRT-PCR	20180629
	QTY
	times	Ni time	Sema3a	beta-acin	ratio	relative to beta-actin
	1st	0	3.99694	269.324	0.0148406	1
		24	3.63359	213.482	0.0170206	1.14689
		48	3.9996	253.89	0.0157533	1.0615
	2nd	0	3.1007	247.71	0.0125175	1
		24	13.5534	693.679	0.0195384	1.56089
		48	3.36491	190.974	0.0176197	1.40761
	3rd	0	4.09957	312.745	0.0131083	1
		24	4.24369	202.538	0.0209526	1.59841
		48	7.55025	224.847	0.0335795	2.56169
	group	1st	2nd	3rd	MEAN	SD
	0	1	1	1	1	0
	24	1.14689	1.56089	1.59841	1.4354	0.250559
	48	1.0615	1.40761	2.56169	1.67693	0.785522
	Statistics
						95% Confidence Interval
	group(I)	group(J)	Mean difference(I-J)	Std. Error	Sig.	Lower Bound	Upper Bound
LSD
	* The mean difference is significant at the 0.05 level

## Sheet: Fig 1c
	WB							Statistics
	group	20190913	20191011	20191031	MEAN	SD								95% Confidence Interval
	0	1	1	1	1	0			group(I)	group(J)	Mean difference(I-J)	Std. Error	Sig.	Lower Bound	Upper Bound
	6	1.32402	2.44121	1.06155	1.60893	0.732631		LSD
	12	2.0508	3.52222	1.97832	2.51711	0.871201
	24	1.80235	0.929195	0.717772	1.14977	0.574948
	48	1.14965	0.544639	0.899671	0.864653	0.304021
	72	0.513986	0.359695	0.201586	0.358422	0.156203
	20190913
	Sema3A
	GAPDH
	20191011
	Sema3A
	GAPDH
	20191031
	Sema3A
	GAPDH
									* The mean difference is significant at the 0.05 level

## Sheet: Fig 1d
	ELISA								Statistics
	group	20210426	20210426	20210513											95% Confidence Interval
	0	0	0	0							group(J)	Mean difference(I-J)	Std. Error	Sig.	Lower Bound	Upper Bound
	12	32.0082	12.4363	16.5162					LSD	0	12	-20.3202	22.0533	0.378528	-69.4581	28.8176
	24	12.2324	26.7075	33.693							24	-24.211	22.0533	0.298006	-73.3488	24.9269
	48	17.5331	85.6269	20.4801							48	-41.2134	22.0533	0.0911866	-90.3512	7.92447
	72	149.032	62.5892	120.458							72	-110.69296*	22.0533	0.000522251	-159.831	-61.5551
										12	0	20.3202	22.0533	0.378528	-28.8176	69.4581
											24	-3.89075	22.0533	0.863482	-53.0286	45.2471
											48	-20.8932	22.0533	0.36577	-70.031	28.2447
											72	-90.37275*	22.0533	0.00215172	-139.511	-41.2349
										24	0	24.211	22.0533	0.298006	-24.9269	73.3488
											12	3.89075	22.0533	0.863482	-45.2471	53.0286
											48	-17.0024	22.0533	0.458554	-66.1403	32.1354
											72	-86.48200*	22.0533	0.00285941	-135.62	-37.3442
										48	0	41.2134	22.0533	0.0911866	-7.92447	90.3512
											12	20.8932	22.0533	0.36577	-28.2447	70.031
											24	17.0024	22.0533	0.458554	-32.1354	66.1403
											72	-69.47959*	22.0533	0.0103237	-118.617	-20.3417
										72	0	110.69296*	22.0533	0.000522251	61.5551	159.831
											12	90.37275*	22.0533	0.00215172	41.2349	139.511
											24	86.48200*	22.0533	0.00285941	37.3442	135.62
											48	69.47959*	22.0533	0.0103237	20.3417	118.617
										* The mean difference is significant at the 0.05 level

## Sheet: Fig 2a
	qRT-PCR							Statistics
	group	20200720	20200721	20200430	MEAN	SD								95% Confidence Interval
	Cont.	1	1	1	1	0			group(I)	group(J)	Mean difference(I-J)	Std. Error	Sig.	Lower Bound	Upper Bound
	Mock	0.622228	1.68424	1.5853	1.29726	0.586682		LSD
	Ni	6.17135	1.06563	2.0785	3.10516	2.70326
	Nimock	1.40776	4.44166	7.71473	4.52138	3.15424
	24 si	2.82921	2.00973	0.880213	1.90638	0.9786
	24 Nisi	1.41323	0	1.97536	1.12953	1.01778
	48 si	0.525077	1.49267	0.764941	0.927564	0.503881
	48 Nisi	0.918403	2.60322	4.49573	2.67245	1.78967
	MEAN	Control	Ni	SD	Control	Ni
	Cont.	1	3.10516	Cont.	0	2.70326
	Mock	1.29726	4.52138	Mock	0.586682	3.15424
	24h si	1.90638	1.12953	24h si	0.9786	1.01778
	48h si	0.927564	2.67245	48h si	0.503881	1.78967
									* The mean difference is significant at the 0.05 level

## Sheet: Fig 2b
	ELISA								Statistics
	group	20210314	20210314	20210318	20210325	MEAN	SD								95% Confidence Interval
	Cont.	18.3333	9.66666	48.4375	33.8333	27.5677	17.1321			group(I)	group(J)	Mean difference(I-J)	Std. Error	Sig.	Lower Bound	Upper Bound
	Mock	67	47.3333	37.5625	34.3333	46.5573	14.7064		LSD	Cont	Mock	-18.9896	57.528	0.74514	-139.851	101.872
	si	167.333	82.6667	33.3125	37.8333	80.2865	62.1601				si	-52.7188	57.528	0.371571	-173.581	68.143
	Ni	253	541.31	183.375	159.75	284.359	175.815				Ni	-256.79104*	57.528	0.000300062	-377.653	-135.929
	NiMock	361.333	262.333	232	248.25	275.979	58.2369				mockNi	-248.41146*	57.528	0.000414145	-369.273	-127.55
	Nisi	70	99.6667	32.375	33.9167	58.9896	32.212				siNi	-31.4219	57.528	0.591634	-152.284	89.4399
										Mock	Cont	18.9896	57.528	0.74514	-101.872	139.851
											si	-33.7292	57.528	0.564949	-154.591	87.1326
	MEAN	Control	Ni	SD	Control	Ni					Ni	-237.80145*	57.528	0.00062372	-358.663	-116.94
	Cont.	27.5677	284.359	Cont.	17.1321	175.815					mockNi	-229.42188*	57.528	0.000862568	-350.284	-108.56
	Mock	46.5573	275.979	Mock	14.7064	58.2369					siNi	-12.4323	57.528	0.831333	-133.294	108.429
	si	80.2865	58.9896	si	62.1601	32.212				si	Cont	52.7188	57.528	0.371571	-68.143	173.581
											Mock	33.7292	57.528	0.564949	-87.1326	154.591
											Ni	-204.07228*	57.528	0.00230142	-324.934	-83.2105
											mockNi	-195.69271*	57.528	0.00317954	-316.554	-74.8309
											siNi	21.2969	57.528	0.715553	-99.5649	142.159
										Ni	Cont	256.79104*	57.528	0.000300062	135.929	377.653
											Mock	237.80145*	57.528	0.00062372	116.94	358.663
											si	204.07228*	57.528	0.00230142	83.2105	324.934
											mockNi	8.37958	57.528	0.885808	-112.482	129.241
											siNi	225.36916*	57.528	0.00100915	104.507	346.231
										mockNi	Cont	248.41146*	57.528	0.000414145	127.55	369.273
											Mock	229.42188*	57.528	0.000862568	108.56	350.284
											si	195.69271*	57.528	0.00317954	74.8309	316.554
											Ni	-8.37958	57.528	0.885808	-129.241	112.482
											siNi	216.98958*	57.528	0.00139614	96.1278	337.851
										siNi	Cont	31.4219	57.528	0.591634	-89.4399	152.284
											Mock	12.4323	57.528	0.831333	-108.429	133.294
											si	-21.2969	57.528	0.715553	-142.159	99.5649
											Ni	-225.36916*	57.528	0.00100915	-346.231	-104.507
											mockNi	-216.98958*	57.528	0.00139614	-337.851	-96.1278
										* The mean difference is significant at the 0.05 level

## Sheet: Fig 2c
	WB							Statistics
	group	20190919	20191107	20200515	MEAN	SD								95% Confidence Interval
	Cont.	1	1	1	1	0			group(I)	group(J)	Mean difference(I-J)	Std. Error	Sig.	Lower Bound	Upper Bound
	Mock	5.34788	2.33887	4.65915	4.1153	1.5765		LSD
	24Ni	13.6561	5.47585	8.72604	9.286	4.11877
	24siNi	4.85618	1.79296	1.22139	2.62351	1.95456
	48Ni	6.99114	1.12033	8.44864	5.52003	3.87932
	48siNi	3.50244	0.198839	7.84449	3.84859	3.83456
	20190919
	p-p38
	p38
	20191107
	p-p38
	p38
	20190515
	p-p38
	p38
									* The mean difference is significant at the 0.05 level

## Sheet: Fig 3e
	Ear thickness	20180301
		LEFT(24h)					RIGHT(24h)					RIGHT(48h)					RIGHT(72h)
		number	data			MEAN	number	data			MEAN	number	data			MEAN	number	data			MEAN
	saline	1	0.28	0.3	0.3	0.293333	1	0.21	0.23	0.23	0.223333	1	0.27	0.21	0.24	0.24	1	0.24	0.23	0.19	0.22
		2	0.2	0.23	0.22	0.216667	2	0.21	0.32	0.34	0.29	2	0.24	0.23	0.23	0.233333	2	0.25	0.19	0.6	0.346667
		3	0.22	0.24	0.22	0.226667	3	0.26	0.26	0.23	0.25	3	0.26	0.24	0.21	0.236667	3	0.26	0.23	0.25	0.246667
		4	0.23	0.21	0.18	0.206667	4	0.27	0.24	0.25	0.253333	4	0.24	0.24	0.23	0.236667	4	0.23	0.25	0.25	0.243333
		5	0.23	0.24	0.2	0.223333	5	0.29	0.3	0.27	0.286667	5	0.23	0.27	0.22	0.24	5	0.22	0.21	0.22	0.216667
		MEAN				0.233333	MEAN				0.260667	MEAN				0.237333	MEAN				0.254667
		SD				0.0343996	SD				0.0278288	SD				0.00278887	SD				0.053156
	Ni	1	0.21	0.22	0.2	0.21	1	0.28	0.27	0.32	0.29	1	0.38	0.53	0.4	0.436667	1	0.49	0.43	0.41	0.443333
		2	0.2	0.2	0.21	0.203333	2	0.26	0.25	0.26	0.256667	2	0.49	0.48	0.48	0.483333	2	0.38	0.43	0.47	0.426667
		3	0.21	0.23	0.19	0.21	3	0.27	0.25	0.25	0.256667	3	0.42	0.54	0.52	0.493333	3	0.51	0.49	0.4	0.466667
		4	0.16	0.19	0.18	0.176667	4	0.31	0.28	0.3	0.296667	4	0.46	0.47	0.44	0.456667	4	0.41	0.39	0.38	0.393333
		5	0.18	0.2	0.2	0.193333	5	0.24	0.29	0.26	0.263333	5	0.48	0.49	0.44	0.47	5	0.47	0.43	0.46	0.453333
		MEAN				0.198667	MEAN				0.272667	MEAN				0.468	MEAN				0.436667
		SD				0.0140633	SD				0.0192065	SD				0.0223109	SD				0.0282843
			Control	Ni 24h	Ni 48h	Ni 72h
		MEAN	0.198667	0.272667	0.468	0.436667
		SD	0.0140633	0.0192065	0.0223109	0.0282843
	Statistics
							95% Confidence Interval
		group(I)	group(J)	Mean difference(I-J)	Std. Error	Sig.	Lower Bound	Upper Bound
	Tukey HSD
		* The mean difference is significant at the 0.05 level
		See Fig 5b for another two repeated experiments

## Sheet: Fig 3f
	WB	20200318						Statistics
				Ni/Cont ratio	MEAN	SD			Levene's Test for Euality of Variances		t-tst for Equality of Means
	Cont.	Cont1	0.016315	1	1	0										95% Confidence Interval of the Difference
		Cont2	0.00821391	1					F	Sig.	t	df	sig.(2-tailed)	Mean Difference	Std. Error difference	Lower	Upper
		Cont3	0.0257685	1				Equal variances assumed	11.2625	0.0284111	22.1566	4	2.45621e-05	0.924473	0.0417246	0.808627	1.04032
	Allergy	Allergy1	0.149479	9.16208	7.14658	4.13391		Equal variances not assumed			22.1566	2	0.00203082	0.924473	0.0417246	0.744947	1.104
		Allergy2	0.0812041	9.88617
		Allergy3	0.0616255	2.3915
	Sema3A
	GAPDH

## Sheet: Fig 3g
	qRT-PCR						Statistics
	IL-17	Δｃｔ-Control	Δｃｔ-Nickel	ΔΔｃｔ-relative	Allergy/Control		IL-17	Levene's Test for Euality of Variances		t-tst for Equality of Means
	1st	18.7169	17.3282	-1.3887	2.61843										95% Confidence Interval of the Difference
	2nd	18.4129	15.8901	-2.5228	5.74696			F	Sig.	t	df	sig.(2-tailed)	Mean Difference	Std. Error difference	Lower	Upper
	3rd	15.0573	13.4461	-1.6112	3.05506		Equal variances assumed
							Equal variances not assumed
	IL-23	Δｃｔ-Control	Δｃｔ-Nickel	ΔΔｃｔ-relative	Allergy/Control		IL-23	Levene's Test for Euality of Variances		t-tst for Equality of Means
	1st	18.6005	16.8107	-1.7898	3.45767										95% Confidence Interval of the Difference
	2nd	18.5346	15.9832	-2.5514	5.86203			F	Sig.	t	df	sig.(2-tailed)	Mean Difference	Std. Error difference	Lower	Upper
	3rd	17.1994	14.4606	-2.7388	6.67515		Equal variances assumed
	4th	3.0619	2.5049	-0.557	1.47121		Equal variances not assumed
	5th	3.7942	2.1811	-1.6131	3.05908
	CCL20	Δｃｔ-Control	Δｃｔ-Nickel	ΔΔｃｔ-relative	Allergy/Control		CCL20	Levene's Test for Euality of Variances		t-tst for Equality of Means
	1st	14.1369	10.8729	-3.264	9.60643										95% Confidence Interval of the Difference
	2nd	13.1347	10.5531	-2.5816	5.98603			F	Sig.	t	df	sig.(2-tailed)	Mean Difference	Std. Error difference	Lower	Upper
	3rd	11.1994	9.7012	-1.4982	2.8249		Equal variances assumed
							Equal variances not assumed
	CXCL1	Δｃｔ-Control	Δｃｔ-Nickel	ΔΔｃｔ-relative	Allergy/Control		CXCL1	Levene's Test for Euality of Variances		t-tst for Equality of Means
	1st	13.2329	11.0915	-2.1414	4.4119										95% Confidence Interval of the Difference
	2nd	11.614	9.7786	-1.8354	3.5687			F	Sig.	t	df	sig.(2-tailed)	Mean Difference	Std. Error difference	Lower	Upper
	3rd	15.8004	14.396	-1.4044	2.64708		Equal variances assumed
							Equal variances not assumed

## Sheet: Fig 4
	FACS							Statistics
	CD11b+CD115+	Control	Allergy	Allergy/Control	MEAN	SD		CD11b+CD115+	Levene's Test for Euality of Variances		t-tst for Equality of Means
	1st	0.18	0.47	2.61111	2.81325	1.98755										95% Confidence Interval of the Difference
	2nd	0.17	0.3	1.76471					F	Sig.	t	df	sig.(2-tailed)	Mean Difference	Std. Error difference	Lower	Upper
	3rd	0.06	0.34	5.66667				Equal variances assumed	6.58551	0.0425507	-1.82461	6	0.117864	-1.81325	0.993773	-4.24493	0.618422
	4th	0.38	0.46	1.21053				Equal variances not assumed			-1.82461	3	0.165556	-1.81325	0.993773	-4.97588	1.34938
	CD11b+F4/80+	Control	Allergy	Allergy/Control	MEAN	SD		CD11b+F4/80+	Levene's Test for Euality of Variances		t-tst for Equality of Means
	1st	2.56	4.15	1.62109	2.26885	0.613897										95% Confidence Interval of the Difference
	2nd	2.48	4.64	1.87097					F	Sig.	t	df	sig.(2-tailed)	Mean Difference	Std. Error difference	Lower	Upper
	3rd	2.15	6.12	2.84651				Equal variances assumed
	4th	0.57	1.56	2.73684				Equal variances not assumed
	CD11c+MHCII+	Control	Allergy	Allergy/Control	MEAN	SD		CD11c+MHCII+	Levene's Test for Euality of Variances		t-tst for Equality of Means
	1st	0.06	0.44	7.33333	5.59242	1.75862										95% Confidence Interval of the Difference
	2nd	0.06	0.3	5					F	Sig.	t	df	sig.(2-tailed)	Mean Difference	Std. Error difference	Lower	Upper
	3rd	0.2	0.68	3.4				Equal variances assumed	15.2777	0.00790452	-5.22275	6	0.00197094	-4.59242	0.879311	-6.74402	-2.44083
	4th	0.11	0.73	6.63636				Equal variances not assumed			-5.22275	3	0.0136531	-4.59242	0.879311	-7.39079	-1.79406

[truncated: 4 more sheets: Fig 5b, Fig 5d, Fig 6, Sup. Fig 1]
